1 **Shared transcriptional responses to con- and heterospecific behavioral antagonists in a wild**  
2 **songbird**

3  
4 Matthew I. M. Louder<sup>1,2\*</sup>, Michael Lafayette<sup>3</sup>, Amber A. Louder<sup>1</sup>, Floria M. K. Uy<sup>4</sup>, Christopher  
5 N. Balakrishnan<sup>5</sup>, Ken Yasukawa<sup>3</sup>, and Mark E. Hauber<sup>1</sup>.

6  
7  
8 <sup>1</sup>Department of Evolution, Ecology, and Behavior, School of Integrative Biology, University of  
9 Illinois at Urbana-Champaign, USA

10 <sup>2</sup>International Research Center for Neurointelligence, University of Tokyo

11 <sup>3</sup>Department of Biology, Beloit College, Beloit, WI, USA

12 <sup>4</sup>Department of Neurobiology and Behavior, Cornell University, Ithaca, NY, USA

13 <sup>5</sup>Department of Biology, East Carolina University, Greenville, NC, USA

14

15

16 \*Correspondence: [mckimlouder@gmail.com](mailto:mckimlouder@gmail.com)

17

18 **Abstract:** The recognition of and differential responses to salient stimuli are among the main  
19 drivers of behavioral plasticity, yet, how animals evolve and modulate functional responses to  
20 novel classes of antagonistic stimuli remain poorly understood. We studied free-living male red-  
21 winged blackbirds (*Agelaius phoeniceus*) to test whether gene expression responses in blood are  
22 distinct or shared between patterns of aggressive behavioral responses directed at simulated  
23 conspecific versus heterospecific intruders. In this species, males defend territories against  
24 conspecific males and respond aggressively to female brown-headed cowbirds (*Molothrus ater*), a  
25 brood parasite that commonly lays eggs in blackbird nests. Both conspecific songs and parasitic  
26 calls elicited aggressive responses from focal subjects and caused a downregulation in genes  
27 associated with immune system response, relative to control calls of a second, harmless  
28 heterospecific species. In turn, only the conspecific song treatment elicited an increase in singing  
29 behavior and an upregulation of genes associated with metabolic processes relative to the two  
30 heterospecific calls. Our results suggest that aspects of antagonistic responses to both conspecifics  
31 and brood parasites can be based on similar physiological responses, suggestive of shared  
32 molecular and behavioral pathways involved in the recognition and reaction to both evolutionarily  
33 old and new enemies.

34  
35 **Key words:** auditory recognition, biomarker, blood, host-parasite interactions, RNA sequencing,  
36 territory defense,

## 37 **Introduction**

38  
39 Faced with a suite of relevant and irrelevant stimuli, animals must rapidly perceive, process, and  
40 decide whether and how behaviorally to respond to diverse cues <sup>1</sup>. Upon the recognition of salient  
41 stimuli, for example, a cascade of neurophysiological and motor responses can be engaged to  
42 facilitate and modulate a reaction <sup>2</sup>. Yet, how recognition systems adapt and enable responses to  
43 evolutionary novel stimuli remain poorly understood <sup>3</sup>. In particular, the timely and accurate  
44 recognition of heterospecific antagonists, such as parasites, predators, or competitors, typically  
45 have substantial fitness advantages <sup>4</sup>. Can evolutionarily established behavioral and physiological  
46 responses to conspecific competitors be co-opted in parallel to adaptively respond to heterospecific  
47 antagonists?

48 Hosts of avian brood parasites pay the costs of raising unrelated young, often with the  
49 additional expense of losing some or all of their own offspring <sup>5</sup>. Many hosts have evolved to  
50 combat brood parasitism by attacking adult parasites, abandoning parasitized nests, and/or rejecting  
51 parasitic offspring <sup>6</sup>. Anti-parasitic defenses can take categorically different responses from  
52 competitive (e.g. territorial defense with song and overt aggression against same-sex conspecific  
53 intruders) or anti-predatory behaviors, and can even be evoked by a partial suite of (visual or  
54 auditory only) sensory cues <sup>7,8</sup>.

55 What constitutes the physiological basis of anti-parasite responses remains largely  
56 unknown in avian host-parasite systems <sup>9</sup>. For example, recent work in wild-caught juvenile male  
57 red-winged blackbirds (*Agelaius phoeniceus*; hereafter: redwings) found no differences in  
58 immediate early gene (IEG) expression levels within the auditory forebrain in response to the calls  
59 of adult female brood parasites (brown-headed cowbirds *Molothrus ater*; hereafter: cowbirds)

60 versus a harmless control species (mourning dove *Zenaida macroura*; hereafter: doves), whereas  
61 responses were stronger to conspecific adult female calls<sup>10</sup>. In the wild, however, juvenile redwings  
62 do not hold territories and may not (yet) have been exposed to parasitism by cowbirds. In contrast,  
63 breeding adult male redwings are well known for territory defense and anti-brood parasite  
64 aggression<sup>11</sup> (Fig. 1). The species-typical “conk-a-ree” song is a long-range “keep-out” signal<sup>12,13</sup>;  
65 and is the most common conspecific territory defense display of this species<sup>14</sup>. Male redwings also  
66 respond strongly to parasitic female cowbirds by approaching and attacking the parasites<sup>15</sup>, but  
67 they respond little to harmless sympatric species. Therefore, we set out to test whether antagonistic  
68 responses to conspecifics and parasites involve distinct or shared behavioral and physiological  
69 responses in freely-behaving adult male redwings on their breeding territories.

70 Linking evolutionarily relevant and ecologically salient stimuli with their proximate  
71 recognition system responses has been difficult in wild animals. This is because, beyond the well-  
72 known complexities of field work, lethal collection is required to sample neural tissues during or  
73 following the undertaking of a recognition task. Furthermore, such terminal collection prohibits  
74 repeated contrasts or ontogenetic comparisons within the same subjects. Alternatively, non-lethal  
75 neuroimaging-based techniques, including functional Magnetic Resonance Imaging or micro  
76 Positron Emission Tomography, require that subjects become captive during or soon after the  
77 recognition task<sup>16,17</sup>.

78 Transcriptomic analyses have become a critical tool to analyze functionally relevant cell  
79 types and tissues both in model species and, increasingly in non-model species collected from the  
80 wild<sup>18,19</sup>. Moreover, non-terminal collection, such as gene expression within peripheral, whole  
81 blood of birds, may reveal functional parallels in the recognition of salient stimuli. For example, a  
82 con- vs. heterospecific acoustic playback paradigm in captive zebra finches (*Taeniopygia guttata*)

83 found that gene expression patterns correlated for a subset of genes between the auditory forebrain  
84 and in peripheral blood <sup>20</sup>.

85 Here we presented playback stimuli of unfamiliar conspecific, parasitic heterospecific, and  
86 control heterospecific vocalizations to free-living adult male redwings on their breeding territories,  
87 recorded their behavioral responses, then caught them to collect blood samples, and assessed  
88 peripheral gene expression patterns. Given the well-known behavioral repertoire of territorial male  
89 redwings <sup>11</sup>, we expected them to respond to playback of conspecific song by increasing their own  
90 singing and approaching and remaining in proximity to the playback speaker when compared to  
91 playback of a harmless heterospecific song. We expected them to approach and maintain proximity  
92 to playback of parasite calls, but not to increase singing, in comparison to the harmless  
93 heterospecific. We also predicted distinct and parallel gene activation and behavioral patterns in  
94 response to conspecific vs. parasitic stimuli relative to controls.

95

96 **Fig. 1. Male red-winged blackbird responding to model presentation of a stuffed female**  
97 **brown-headed cowbird. Photo credit: K. Yasukawa.**

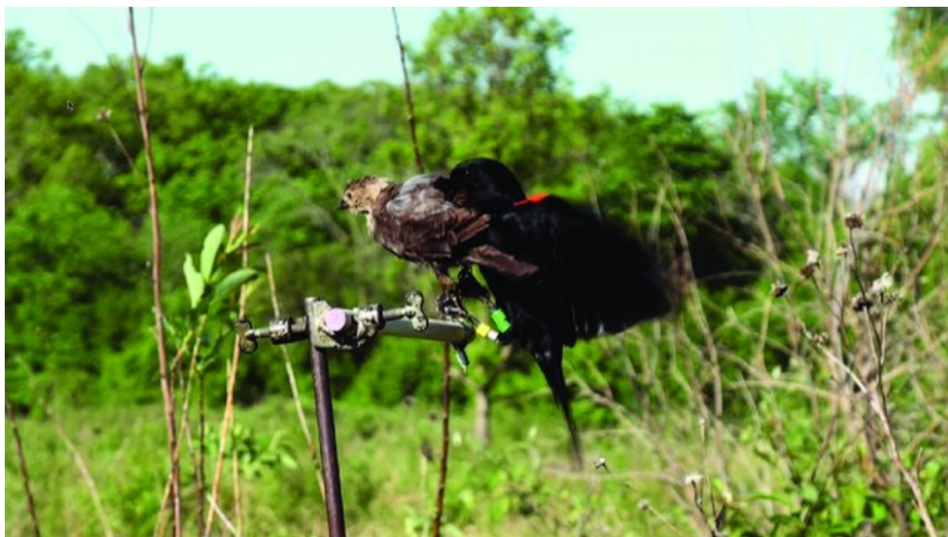

98

99

## 100 **Results**

### 101 *Behavioral response to playbacks*

102 We performed playbacks to 34 territorial male red-wings. Whether or not a subject was caught  
103 within 30 min. had no impact on its response behaviors statistically (all  $z > -1.9, p \geq 0.05$ ), nor were  
104 there differences in behavioral responses between the 1<sup>st</sup> and 3<sup>rd</sup> playback trial segment (see  
105 Methods), therefore behavioral data from all subjects and territories in response to the playback  
106 paradigm were analyzed statistically ( $n_{\text{redwing}} = 11, n_{\text{cowbird}} = 12, n_{\text{dove}} = 12$ ). However,  
107 transcriptomic data were only available for subjects caught within 30 min of its respective playback  
108 set's delivery (see below for sample sizes). Generalized linear mixed models, with playback type  
109 as the independent predictor, revealed that male redwings responses were significantly variable  
110 during active playback periods: number of songs  $z = -2.82, p = 0.005$ , number of approaches  $z = -$   
111  $2.50, p = 0.01$ , and nearest distance to the playback speaker ( $z = -2.10, p = 0.04$ ), but not in the time  
112 spent near the playback speaker ( $z = -0.90, p = 0.17$ ) (Fig. 2). Tukey-corrected post-hoc analyses  
113 revealed that subjects sang significantly more in response to Redwing than Cowbird ( $p = 0.02$ ) or  
114 Dove ( $p = 0.02$ ) playbacks and did not differ significantly in songs in response to Cowbird and  
115 Dove playbacks ( $p = 0.99$ ). Territorial male redwings approached more frequently to Redwing  
116 versus Dove ( $p = 0.005$ ) and Cowbird versus Dove playbacks ( $p = 0.03$ ), but did not differ between  
117 Redwing versus Cowbird playback ( $p = 0.79$ ). Territorial male redwings approached more closely  
118 to Cowbird than Dove playbacks ( $p = 0.003$ ), but did not differ in response to Redwing vs. Dove  
119 ( $p = 0.10$ ), nor to Redwing vs. Cowbird playbacks ( $p = 0.38$ ).

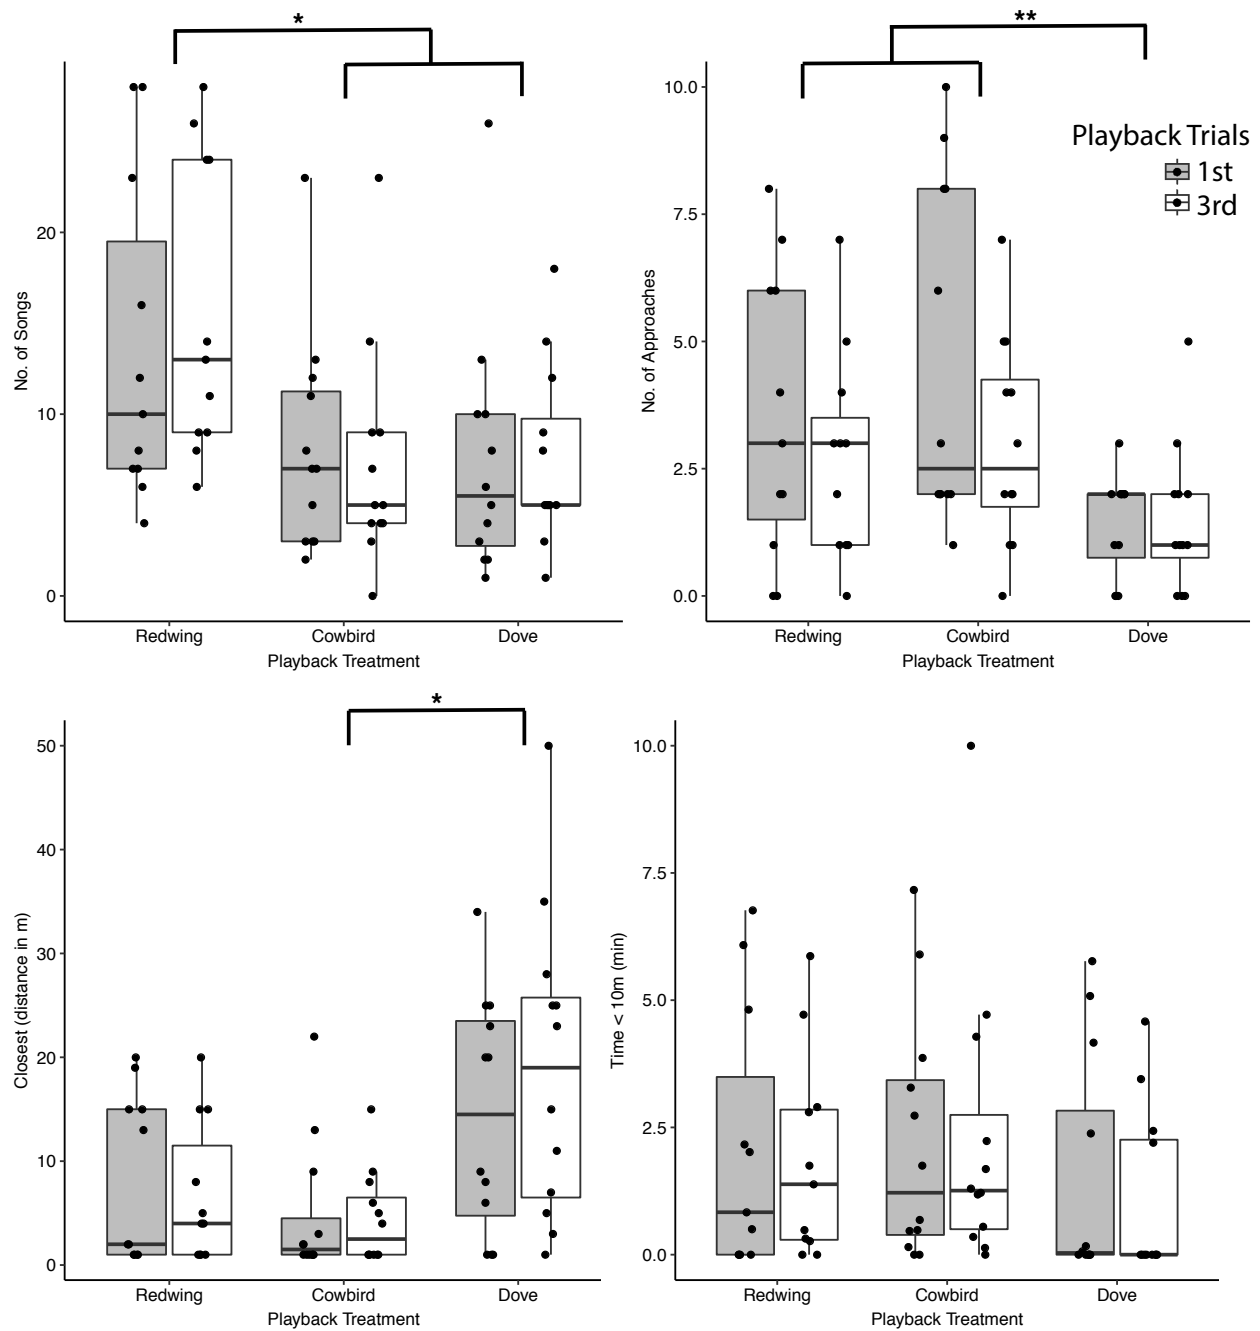

120

121 **Fig. 2. Boxplots depicting the behavioral responses to playback type for male red-winged**  
122 **blackbirds in the 1<sup>st</sup> (grey boxes) and 3<sup>rd</sup> (white boxes) trials. Stars denote \*:  $p < 0.05$  and**  
123 **\*\* :  $p < 0.01$  between indicated groups.**

124

125

126

127 *Gene expression*

128 We were able to extract enough RNA from the blood of 21 males upon experimental presentations  
129 of playback treatments ( $n_{\text{redwing}} = 6$ ,  $n_{\text{cowbird}} = 8$ ,  $n_{\text{dove}} = 7$ ). For these samples, we sequenced an  
130 average of 15.9 million reads per sample (range = 11.7 – 19.1 million reads).

131 We first tested for differential gene expression for 20 candidate biomarker genes, previously  
132 identified from peripheral (whole blood) in Louder et al. <sup>20</sup>. This analysis yielded no significant  
133 differentially expressed genes in response to conspecific songs versus dove coo playback  
134 treatments (all Bonferroni corrected  $p$ -values  $> 0.50$ ).

135 After filtering for lowly expressed genes, we then incorporated the read counts of 7202  
136 genes for co-expression analysis (WGCNA). Two modules were significantly correlated with  
137 playback treatments (Figs. 3 and 4), the “dark-turquoise” module included upregulated genes in  
138 response to Redwing song treatment ( $r = 0.52$ ,  $p = 0.01$ ) and the “yellow” module included genes  
139 downregulation in response to both Redwing songs and Cowbird chatter relative to Dove coo ( $r =$   
140  $0.64$ ,  $p = 0.002$ ).



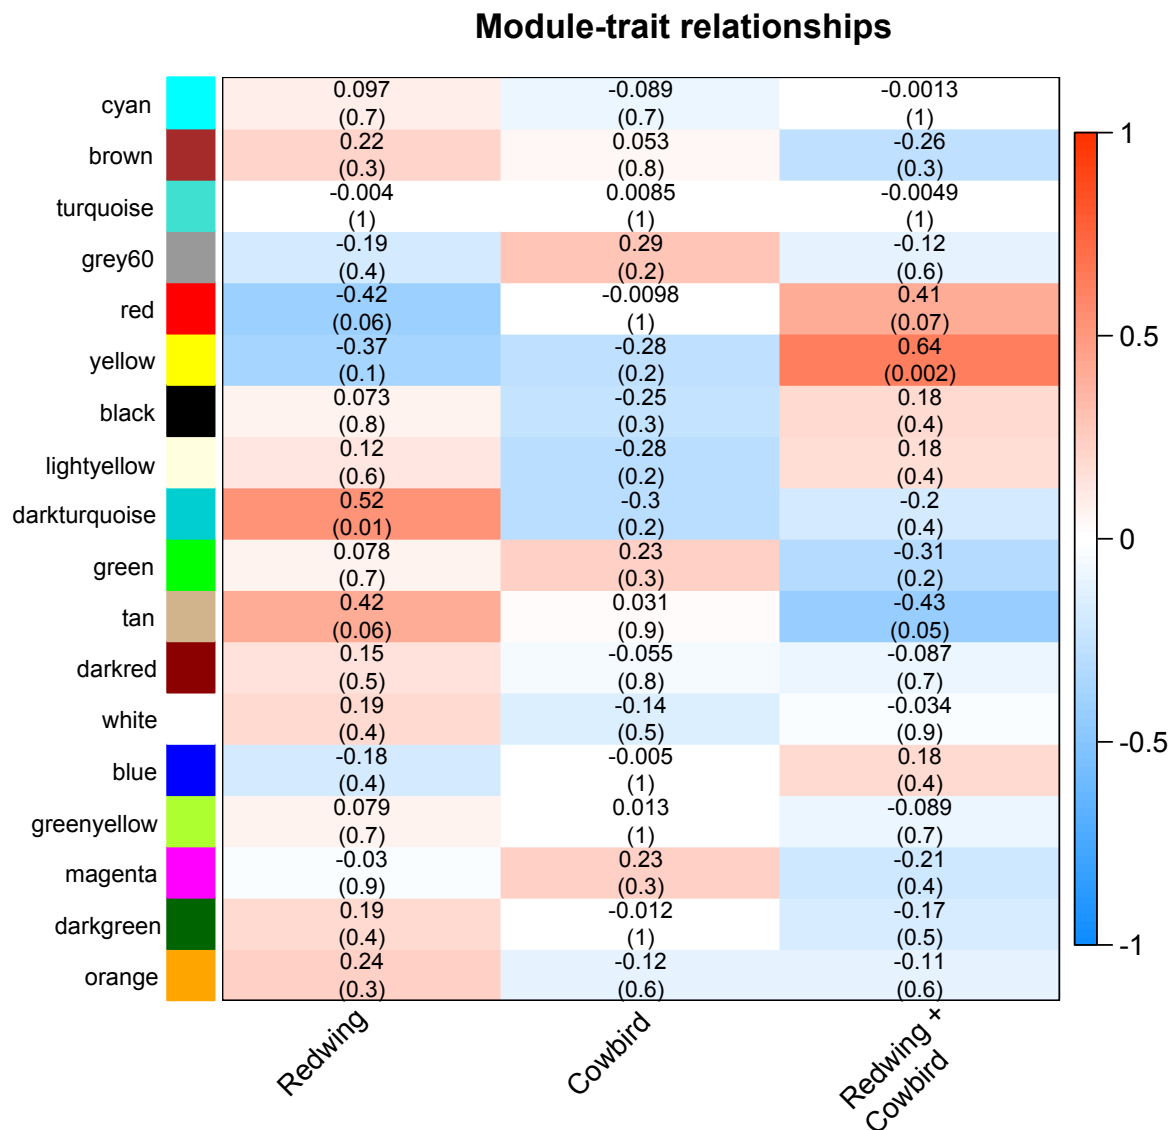

141  
 142 **Fig. 3. Statistical associations between expression profiles of each WGCNA reconstructed**  
 143 **modules and the playback groups. Presented are correlation coefficients and associated *p*-**  
 144 **values (within brackets).**  
 145

146 Using a rank-ordered approach, we identified an enrichment for gene ontology (GO) terms  
 147 for each significant module. For the “dark-turquoise” module, correlated with a response to  
 148 Redwing song playback, we found significant GO terms associated with the metabolism, regulation  
 149 of gene expression, and protein ubiquitination (Table 1). For the “yellow” module, correlated with

150 a response to both Redwing song and Cowbird playback, we find significant GO terms associated  
151 with immune system response, such as defense responses to virus and cytokine-mediated pathways  
152 (Table 1).

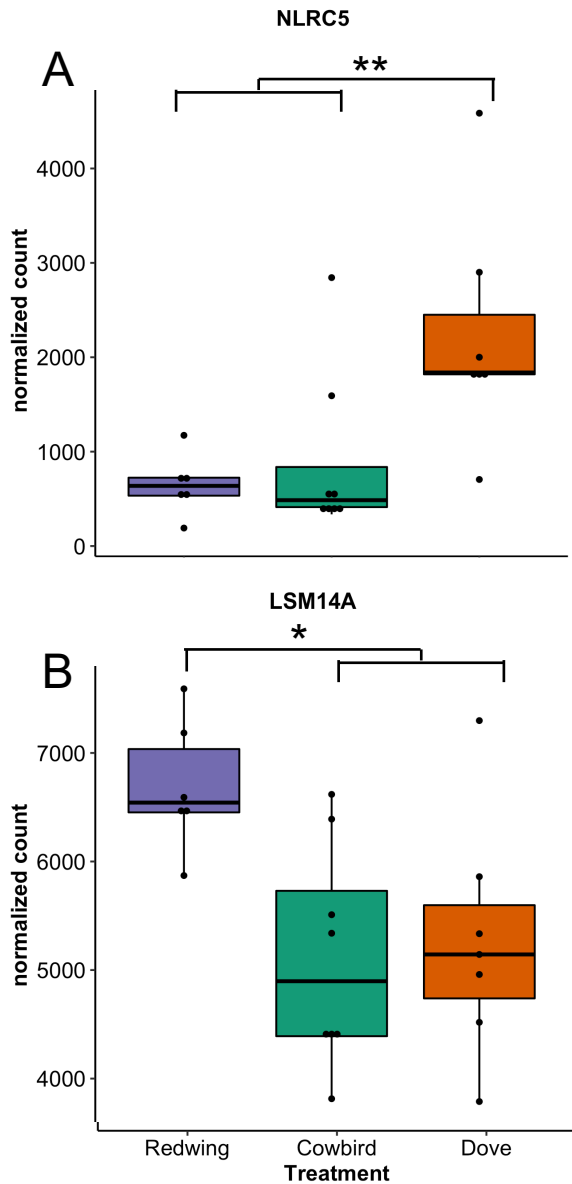

153  
154 **Fig. 4. The top gene's expression profiles from each of the (A) the “yellow” module, which**  
155 **includes genes significantly downregulated in song and chatter treatments relative to dove**  
156 **coo and (B) the “dark-turquoise” module, which includes genes associated with an**  
157 **upregulation in response to the red-winged blackbird song treatment. Stars denote \*:  $p < 0.05$**   
158 **and \*\*:  $p < 0.01$  between indicated groups.**

159  
160

## 161 **Discussion**

162 Our expectations that subjects would sing in response to conspecific playback and approach, spend  
163 and perch close to redwing and cowbird playback were confirmed. We are therefore confident that  
164 we produced meaningful behavioral differences in aggressive responses of our subject male red-  
165 winged blackbirds. By studying free-living male territorial red-winged blackbirds, we detected  
166 patterns of co-expressed genes matching patterns of variation in aggressive behavioral responses  
167 to different classes of playbacks. In one behavioral response metric (approach distance) and in a  
168 co-expressed gene module, responses to conspecific songs and brood parasitic heterospecific calls  
169 were similar and both were significantly different from responses to harmless heterospecific calls.  
170 In turn, in a second behavioral response (number of songs) and another co-expressed gene module,  
171 responses to conspecific songs were significantly different from responses to both brood parasitic  
172 heterospecific and harmless heterospecific calls. Integrating the discriminability generated by these  
173 two patterns of responses provides for unique encoding for each of the three different playback  
174 types in both the behavioral and gene expression domains, separating conspecific songs from brood  
175 parasitic calls from harmless heterospecific calls.

176 Our results demonstrate that antagonistic responses to both conspecifics and brood parasites  
177 can involve similar physiological responses. The gene module correlated with both conspecific  
178 songs and cowbird chatters, relative to dove coos, was enriched for gene ontology immune system  
179 terms (Table 1), including defense responses to viruses and regulation of type I interferon  
180 production. For example, the top gene from the module, NLRC5 (NOD-like receptor family CARD  
181 domain containing 5 gene; Fig. 4), regulates adaptive immune responses against pathogens,

182 including the activation of MHC class I genes<sup>21</sup>. Unsurprisingly, these genes from the module were  
183 downregulated relative to the control playbacks, perhaps as a trade-off between aggressive  
184 responses and immune function seen elsewhere in avian and other vertebrate lineages<sup>22</sup>. Similarly,  
185 luteinizing hormone decreases in male red-wing blackbirds in response to simulated territorial  
186 intrusion<sup>23</sup>. However, the source of the mRNA expression in peripheral blood, such as  
187 erythrocytes, leukocytes or exosomes<sup>24</sup>, as well as the physiological function of these genes in  
188 either immunosuppressive or enhancement of immune response to acute stress remains unclear.

189 Overall, the behavioral and gene expression data indicate that similar physiological  
190 pathways may be involved in the cognitive recognition and motor responses to distinct antagonistic  
191 threats, in this case conspecific and heterospecific intruders. Many host species of brood parasites  
192 have evolved aggressive anti-parasitic behaviors<sup>6</sup>, yet the cognitive and physiological mechanisms  
193 involved in this behavioral evolution remain unclear<sup>9</sup>. Our study suggests that some of proximate  
194 responses to conspecific intruders were co-opted in the evolution of anti-parasitic aggression  
195 towards female cowbirds.

196 The gene expression responses found here in adult, territorial redwing males are different  
197 from the IEG patterns detected from juvenile redwing males, which showed that the only  
198 conspecific calls generated differential responses in the auditory forebrain relative to cowbird and  
199 dove calls<sup>10</sup>. In turn, our behavioral data from adult red-winged blackbirds confirm previous  
200 findings in this and other avian hosts of brood parasitic species, which demonstrated behavioral  
201 responses to heterospecific parasitic models and auditory stimuli<sup>15,25-27</sup>.

202 We did not find differential gene expression in a candidate set of potential biomarker genes,  
203 previously identified from peripheral whole blood in a conspecific vs. harmless heterospecific  
204 (dove) acoustic playback paradigm in captive female zebra finches<sup>20</sup>. Given that our experimental

205 treatments in the present study also included conspecific (redwing songs) vs. irrelevant  
206 heterospecific (dove) comparisons, we predicted that we would detect some of these same potential  
207 biomarker genes to be differentially expressed in free-living redwings. However, the use of  
208 different study species (zebra finches vs. red-winged blackbirds) or the different sexes of our  
209 subjects (female finches vs. male blackbirds) likely contributed to our inability to identify  
210 consistent gene expression differences within whole blood for conspecific recognition in songbirds.

211 In conclusion, our study demonstrates a parallel in behavioral and gene expression  
212 responses to simulated antagonistic threats. In particular, we find support for physiological  
213 responses involved in conspecific territorial aggression co-opted in the evolved recognition of  
214 heterospecific brood parasites. In addition, our study further demonstrates the utility for peripheral  
215 gene expression to study avian recognition and behavioral responses to social stimuli.

216

217

## 218 **Methods**

### 219 *Study Species and Study Area:*

220 We studied red-winged blackbirds at Newark Road Prairie in Rock County, Wisconsin, USA (42°  
221 32' N, 89° 08' W) during the breeding season of 2018. Newark Road Prairie is a 13-ha wet-mesic  
222 remnant prairie and sedge meadow habitat that supports about 35 male redwing territories<sup>28</sup>. All  
223 males were captured in Potter traps baited with non-viable sunflower seeds and were banded with  
224 United States Geological Survey numbered aluminum bands and unique color combinations of  
225 plastic wraparound bands for individual identification (USGS permit # 20438 to KY); most females  
226 at this study site were not banded.

227 We used observations of territorial behaviors to place additional seed-baited traps within  
228 breeding territories of potential subjects and allowed them to use the traps without being captured  
229 for 1–3 weeks prior to playbacks. Previous work at this site on redwings’ responses to model  
230 cowbirds vs. harmless heterospecifics, coupled with their respective call playbacks, showed  
231 strongly graded aggressive responses to the former relative to the latter <sup>15</sup>.

232

233 *Playbacks:*

234 We presented one of three playback types at each territory: (1) male conspecific songs (“Redwing”;  
235 highly salient), (2) female cowbird chatter calls (“Cowbird”; salient heterospecific vocalization of  
236 a brood parasite of redwing nests), or (3) dove coo (“Dove”; non-salient vocalizations of a harmless  
237 sympatric heterospecific) for broadcasts. Given that male red-winged blackbirds exhibit greater  
238 behavioral responses to female vs. male cowbird models <sup>15</sup>, the chatter call, a specific call of female  
239 cowbirds was chosen to acoustically simulate brood parasite intrusion. To address pseudo-  
240 replication <sup>29</sup>, one out of five available exemplars were assigned at random for each playback type.  
241 Audacity v 2.2.0 was used to filter playback stimuli above 2000 Hz and below 500 Hz, and  
242 normalize mean amplitude of all stimuli. Acoustic stimuli were matched in peak amplitude and  
243 duration.

244 Playback types and exemplar files were randomly assigned to territorial male redwings  
245 using a stratified balanced design to keep sample sizes per type similar. For each playback type we  
246 randomly chose one of the exemplars to broadcast from an iPhone 5 or 6 (Apple Inc., Cupertino,  
247 California, USA) connected to an Ecoxgear ECOXBT speaker (Grace Digital Audio, Peterborough,  
248 Ontario, Canada) via a 30-m auxiliary cable. Playbacks were broadcasted at 80–85 dB SPL at 1 m

249 from the source (as measured by a sound pressure meter: Pyle PSPL01, Pyle Audio Inc., Brooklyn,  
250 New York, USA), which approximated natural amplitude (KY personal observations).

251 We used a 30 min. paradigm to induce (differential) gene expression (e.g., <sup>20</sup>), but to avoid  
252 habituation in the field, each playback consisted of three 10-min segments for a total period of 30  
253 min. The first and third segments were active sound broadcast periods and the second segment was  
254 a 10-min silent period. Each active period consisted of 10 1-min sub-segments in which an  
255 exemplar played at 0, 10, 20, 30, and 40 s, followed by 20 s of silence. As soon as the 30-min  
256 playback was completed, we removed the playback equipment and baited and set the trap; we aimed  
257 to capture each subject within 30 min of the end of the playback, banded all previously unmarked  
258 subjects as described above, took a blood sample of approximately 100  $\mu$ L (see below), and  
259 released the subject. We recorded the time to capture for all samples obtained within the 30-min  
260 maximum.

261 Prior to playback, we placed two markers each 10 m from the speaker to facilitate measuring  
262 proximity time to the speaker within 10 m. During each 10-min segment we recorded (1) number  
263 of songs (songs), (2) number of flights towards the speaker (approaches), (3) time spent within 10  
264 m of the speaker (time in proximity), and (4) the distance (m) of the closest approach (closest  
265 approach). These behavioral variables are well known to indicate a male redwing's aggressiveness  
266 <sup>30</sup>. We analyzed behavioral data collected during the 1st and 3rd 10-min periods, which preceded  
267 the capture timepoint by up to 30 min and, thus, is representative of the time sampled for the gene-  
268 expression patterns, too. Number of songs and number of approaches were the totals for periods 1  
269 and 3 (active playback). Time (min) within 10 m was the total time for the active playback periods.  
270 Closest approach was the shortest distance between the subject and the speaker during the two  
271 active playback periods.

272 We used generalized linear mixed models with a negative binomial response and individual  
273 male identity as a random effect with glmmTMB in R (version 3.5.1) to analyze the responses of  
274 male redwings to the three playbacks. Each model included playback treatment, trail period, and  
275 whether the male was captured as explanatory variables. A significant result was further examined  
276 with a Tukey post-hoc analysis to identify significantly different pairs of treatment. The alpha level  
277 was set at the  $p < 0.05$ .

278  
279 *RNA extraction and sequencing:*  
280 A blood sample from each subject was collected from the brachial vein using a 1.27 cm 27 g needle  
281 and heparinized capillary tube (Fisher Scientific, Pittsburgh, Pennsylvania, USA). Blood was  
282 placed in 500  $\mu$ l of RNAlater and then stored in a  $-80^{\circ}\text{C}$  freezer for processing. RNA was extracted  
283 with RiboPure blood kits (Life Technologies, Carlsbad, California, USA) and treated with DNase  
284 for purification. We assessed the quality of purified RNA on a Bioanalyzer (Agilent, Wilmington,  
285 Delaware, USA) (RIN > 7.0).

286 All library preparations and sequencing were performed at the University of Illinois at  
287 Urbana-Champaign Roy J. Carver Biotechnology Center, Urbana, IL, USA. A library for each  
288 sample was prepared with an Illumina TruSeq Stranded RNA sample prep kit. All libraries were  
289 pooled, quantitated by qPCR, and sequenced on one lane of an Illumina HiSeq 4000 with a HiSeq  
290 4000 sequencing kit version 1, producing single-end 100 bp reads. Fastq files were demultiplexed  
291 with bcl2fastq v 2.17.1.14 (Illumina).

292  
293 *Preparation of reference genome:*  
294 Lacking an annotated reference genome for the red-winged blackbird, we created a proxy reference



295 following the pseudo-it pipeline (<https://github.com/bricesarver/pseudo-it>). Briefly, we extracted  
296 DNA from liver and muscle tissue of a male red-winged blackbird (cataloged at the Museum of  
297 Southwestern Biology MSB:Bird:40979) and performed paired-end (200 bp) whole-genome  
298 sequencing on one lane of HiSeq (2500) at the Duke Genome Center. After removing the Illumina  
299 adapters with Trim Galore! v 0.3.7  
300 ([http://www.bioinformatics.babraham.ac.uk/projects/trim\\_galore/](http://www.bioinformatics.babraham.ac.uk/projects/trim_galore/)), which incorporates Cutadapt v  
301 1.7.1<sup>31</sup>, we aligned the DNA reads to the closest related species publicly available, the white-  
302 throated sparrow (*Zonotrichia alibicolis*) genome (assembly *Zonotrichia\_albicollis*-1.0.1), with  
303 BWA-mem<sup>32</sup>. Using GATK<sup>33</sup> we then identified and inserted red-winged blackbird SNPs into the  
304 white-throated sparrow reference genome. To improve the proxy reference genome, we performed  
305 an additional iteration of the pseudo-it pipeline.

306  
307 *Gene expression:*  
308 We removed Illumina adapters from RNA reads with Trim Galore! v 0.3.7. We then aligned the  
309 reads to the proxy reference genome with Hisat2<sup>34</sup> and quantified read abundance with HTSeq-  
310 count<sup>35</sup>. With DeSeq2<sup>36</sup>, we then included the playback treatments and time to capture (minutes)  
311 to analyze the gene expression patterns of the 20 top genes identified from the parallel expression  
312 patterns of peripheral (whole blood) RNA-sequencing study of Louder et al.<sup>20</sup>.

313 Next, we sought to identify networks of genes specifically responsive to Redwing song,  
314 Cowbird chatter or both Redwing and Cowbird relative to Dove coo. We performed weighted gene  
315 co-expression network analysis (WGCNA), which is used for finding clusters (modules) of highly  
316 correlated genes and determine the relationship of modules to treatments. We used the WGCNA  
317 package in R (Langfelder & Horvath 2008) to identify modules of co-expressed genes in our

318 dataset. To remove genes with low read abundance, we filtered for genes with < 1 count per million  
319 in at least 10 samples. We then normalized for read-depth and extracted variance stabilizing  
320 transformed (vst) read counts from DEseq2 into WGCNA. To build the co-expression matrix, we  
321 chose a soft thresholding power ( $\beta$ ) value of 12, at which at which we observed a plateau in Mean  
322 Connectivity, thus representing a scale-free topology<sup>37</sup>. We generated a signed network with  
323 minimum module size of 30 genes and merged highly correlated modules (dissimilarity threshold  
324 = 0.25). We then correlated the eigengene, which is the first principal component of a module, of  
325 these merged modules with playback treatments (Redwing, Cowbird, Dove). Modules with  $p \leq$   
326 0.05 were considered significantly correlated with a given trait.

327 Finally, we tested for functional enrichment of gene ontology (GO) categories with GOrilla  
328<sup>38</sup>. For each module, genes were ranked based on their module membership score determined in the  
329 WGCNA analysis. We preferred this rank-order based approach (as opposed to strict module  
330 assignment) as it reflects the correlation among modules, and because some genes could be  
331 assigned to multiple modules<sup>39</sup>. GOrilla performs ranked-order analyses with human gene IDs, so  
332 we identified orthologous genes from the annotated red-winged blackbird proxy-genome.  
333 Statistical significance of GO categories was determined with  $p$ -values corrected for multiple  
334 hypothesis testing ( $FDR < 0.05$ ). We used REVIGO to remove redundant and overlapping GO  
335 categories, with an allowed semantic similarity measure of 0.5<sup>40</sup>.

### 336 337 **Data Accessibility**

338 The data that support the findings of this study are being submitted to NCBI, and will be available  
339 prior to publication.

### 341 **Author contributions**

342 M.I.M.L., K.Y., F.M.K.U. and M.E.H. designed the project; M.L., K.Y. collected data and  
343 samples; A.A.L. collected laboratory data, M.I.M.L., C.B. and M.E.H. analyzed the data; M.I.L.,

344 and M.E.H. wrote the first draft, and all authors provided critical feedback, reviewed, and edited  
345 the manuscript. All authors approve the manuscript.

346

### 347 **Acknowledgements**

348 For financial support we thank the National Science Foundation IOS Program in Behavioral  
349 Systems (nos. 1456524 and 1456612 to M.E.H. and C.B.) and the National Academies Keck  
350 Futures Initiative Grant (to F.M.K.U. and M.E.H). Additional funding was provided by the Harley  
351 Jones Van Cleave Professorship at the University of Illinois (to M.E.H.) and the Mead-Witter  
352 Foundation (to K.Y.). For discussions, we are grateful to Kathleen Lynch, Mikus Abolins-Abols,  
353 and Sarah London. Capture and banding were conducted under USGS banding permit #20438 to  
354 K.Y. The playback protocol was approved by the Beloit College IACUC (protocol #18002).

355

### 356 **Additional Information**

357 **Competing Interests:** The authors declare no competing interests.

358

### 359 **References**

- 360 1. Mendelson, T. C. *et al.* Cognitive Phenotypes and the Evolution of Animal Decisions. *Trends*  
361 *in Ecology & Evolution* **31**, 850–859 (2016).
- 362 2. Patrick, C. J. Psychophysiological correlates of aggression and violence: an integrative  
363 review. *Philos. Trans. R. Soc. Lond. B Biol. Sci.* **363**, 2543–2555 (2008).
- 364 3. Louder, M. I. M., Lawson, S., Lynch, K. S., Balakrishnan, C. N. & Hauber, M. E. Neural  
365 mechanisms of auditory species recognition in birds. *Biological Reviews* **94**, 1619–1635  
366 (2019).
- 367 4. Peiman, K. S. & Robinson, B. W. Ecology and Evolution of Resource-Related Heterospecific  
368 Aggression. *The Quarterly Review of Biology* **85**, 133–158 (2010).
- 369 5. Davies, N. B. *Cuckoos, Cowbirds and Other Cheats*. (T & AD Poyser Ltd, 2000).

- 370 6. Feeney, W. E., Welbergen, J. A. & Langmore, N. E. The frontline of avian brood parasite–  
371 host coevolution. *Animal Behaviour* **84**, 3–12 (2012).
- 372 7. Burgham, M. C. J. & Picman, J. Effect of brown-headed cowbirds on the evolution of yellow  
373 warbler anti-parasite strategies. *Animal Behaviour* **38**, 298–308 (1989).
- 374 8. Campobello, D. & Sealy, S. G. Enemy Recognition of Reed Warblers (*Acrocephalus*  
375 *scirpaceus*): Threats and Reproductive Value Act Independently in Nest Defence Modulation.  
376 *Ethology* **116**, 498–508 (2010).
- 377 9. Abolins-Abols, M. & Hauber, M. E. Host defences against avian brood parasitism: an  
378 endocrine perspective. *Proc Biol Sci* **285**, (2018).
- 379 10. Lynch, K. S., Louder, M. I. M. & Hauber, M. E. Species-specific auditory forebrain  
380 responses to non-learned vocalizations in juvenile blackbirds. *Brain, Behavior and Evolution*  
381 **91**, 193–200 (2018).
- 382 11. Searcy, W. A. & Yasukawa, K. Red-winged Blackbird (*Agelaius phoeniceus*), version 2.0. in  
383 *The Birds of North America* (Cornell Lab of Ornithology, 2019).
- 384 12. Peek, F. W. An experimental study of the territorial function of vocal and visual display in  
385 the male red-winged blackbird (*Agelaius phoeniceus*). *Animal Behaviour* **20**, 112–118  
386 (1972).
- 387 13. Yasukawa, K. Song repertoires in the red-winged blackbird (*Agelaius phoeniceus*): A test of  
388 the Beau Geste hypothesis. *Animal Behaviour* **29**, 114–125 (1981).
- 389 14. Peek, F. W. Seasonal Change in the Breeding Behavior of the Male Red-Winged Blackbird.  
390 *Wilson Bull.* **83**, 383–395 (1971).
- 391 15. Yasukawa, K., Lindsey-Robbins, J., Henger, C. S. & Hauber, M. E. Antiparasitic behaviors  
392 of Red-winged Blackbirds (*Agelaius phoeniceus*) in response to simulated Brown-headed

- 393 Cowbirds (*Molothrus ater*): further tests of the frontloaded parasite-defense hypothesis.  
394 *Wilson J. Ornithol.* **128**, 475–486 (2016).
- 395 16. Louder, M. I. M. *et al.* Shared neural substrates for song discrimination in parental and  
396 parasitic songbirds. *Neurosci. Lett.* **622**, 49–54 (2016).
- 397 17. Tokarev, K. *et al.* Sexual dimorphism in striatal dopaminergic responses promotes  
398 monogamy in social songbirds. *eLife* **6**, e25819 (2017).
- 399 18. Ekblom, R. & Galindo, J. Applications of next generation sequencing in molecular ecology of  
400 non-model organisms. *Heredity* **107**, 1–15 (2011).
- 401 19. Jax, E., Wink, M. & Kraus, R. H. S. Avian transcriptomics: opportunities and challenges. *J*  
402 *Ornithol* **159**, 599–629 (2018).
- 403 20. Louder, M. I. M., Hauber, M. E. & Balakrishnan, C. N. Early social experience alters  
404 transcriptomic responses to species-specific song stimuli in female songbirds. *Behav. Brain*  
405 *Res.* **347**, 69–76 (2018).
- 406 21. Kobayashi, K. S. & van den Elsen, P. J. NLRC5: a key regulator of MHC class I-dependent  
407 immune responses. *Nat. Rev. Immunol.* **12**, 813–820 (2012).
- 408 22. Takahashi, A., Flanigan, M. E., McEwen, B. S. & Russo, S. J. Aggression, Social Stress, and  
409 the Immune System in Humans and Animal Models. *Front. Behav. Neurosci.* **12**, (2018).
- 410 23. Harding, C. & Follett, B. Hormone changes triggered by aggression in a natural population of  
411 blackbirds. *Science* **203**, 918 (1979).
- 412 24. Li, M. *et al.* Analysis of the RNA content of the exosomes derived from blood serum and  
413 urine and its potential as biomarkers. *Philos. Trans. Royal Soc. B* **369**, 20130502 (2014).
- 414 25. Capper, C.-L., Guigueno, M. F. & Sealy, S. G. Acceptance of Simulated Cowbird Parasitism  
415 in a Northern Population of Red-Winged Blackbirds. *Am. Midl. Nat.* **167**, 127–135 (2012).

- 416 26. Gill, S. A., Neudorf, D. L. H. & Sealy, S. G. Do Hosts Discriminate between Sexually  
417 Dichromatic Male and Female Brown-headed Cowbirds? *Ethology* **114**, 548–556 (2008).
- 418 27. Henger, C. S. & Hauber, M. E. Variation in antiparasitic behaviors of Red-winged Blackbirds  
419 in response to simulated Brown-headed Cowbirds. *Wilson J. Ornithol.* **126**, 488–499 (2014).
- 420 28. Yasukawa, K. The costs and benefits of a vocal signal: the nest-associated ‘Chit’ of the  
421 female red-winged blackbird, *Agelaius phoeniceus*. *Anim. Behav.* **38**, 866–874 (1989).
- 422 29. Kroodsma, D. E., Byers, B. E., Goodale, E., Johnson, S. & Liu, W.-C. Pseudoreplication in  
423 playback experiments, revisited a decade later. *Anim. Behav.* **61**, 1029–1033 (2001).
- 424 30. Yasukawa, K. Aggressive tendencies and levels of a graded display: Factor analysis of  
425 response to song playback in the redwinged blackbird (*Agelaius phoeniceus*). *Behavioral*  
426 *Biology* **23**, 446–459 (1978).
- 427 31. Martin, M. Cutadapt removes adapter sequences from high-throughput sequencing reads.  
428 *EMBnet.journal* **17**, 10–12 (2011).
- 429 32. Li, H. & Durbin, R. Fast and accurate long-read alignment with Burrows–Wheeler transform.  
430 *Bioinformatics* **26**, 589–595 (2010).
- 431 33. Auwera, G. A. V. der *et al.* From FastQ Data to High-Confidence Variant Calls: The Genome  
432 Analysis Toolkit Best Practices Pipeline. *Current Protocols in Bioinformatics* **43**, 11.10.1-  
433 11.10.33 (2013).
- 434 34. Kim, D., Langmead, B. & Salzberg, S. L. HISAT: a fast spliced aligner with low memory  
435 requirements. *Nature Methods* **12**, 357–360 (2015).
- 436 35. Anders, S., Pyl, P. T. & Huber, W. HTSeq—a Python framework to work with high-  
437 throughput sequencing data. *Bioinformatics* **31**, 166–169 (2015).

- 438 36. Love, M. I., Huber, W. & Anders, S. Moderated estimation of fold change and dispersion for  
439 RNA-seq data with DESeq2. *Genome Biol.* **15**, 550 (2014).
- 440 37. Langfelder, P. & Horvath, S. WGCNA: an R package for weighted correlation network  
441 analysis. *BMC Bioinformatics* **9**, 559 (2008).
- 442 38. Eden, E., Navon, R., Steinfeld, I., Lipson, D. & Yakhini, Z. GOrilla: a tool for discovery and  
443 visualization of enriched GO terms in ranked gene lists. *BMC Bioinformatics* **10**, 48 (2009).
- 444 39. Horton, B. M., Ryder, T. B., Moore, I. T. & Balakrishnan, C. N. Gene expression in the social  
445 behavior network of the wire-tailed manakin (*Pipra filicauda*) brain. *Genes, Brain and*  
446 *Behavior* **0**, e12560 (2019).
- 447 40. Supek, F., Bošnjak, M., Škunca, N. & Šmuc, T. REVIGO Summarizes and Visualizes Long  
448 Lists of Gene Ontology Terms. *PLOS ONE* **6**, e21800 (2011).
- 449

450 **Table 1. Significant GO terms associated with “dark-turquoise” module, specific to**  
451 **conspecific song playback and “yellow” module, shared responses for conspecific song and**  
452 **cowbird chatter playback. FDR represents the *p*-value adjusted for false discovery rate.**

**Significant GO terms associated with “yellow” module**

| term_ID    | description                                                                    | FDR      |
|------------|--------------------------------------------------------------------------------|----------|
| GO:0051607 | defense response to virus                                                      | 3.16E-05 |
| GO:0060759 | regulation of response to cytokine stimulus                                    | 0.006    |
| GO:0032480 | negative regulation of type I interferon production                            | 0.01     |
| GO:2000042 | negative regulation of double-strand break repair via homologous recombination | 0.04     |
| GO:0009607 | response to biotic stimulus                                                    | 0.04     |

**GO terms associated with “dark-turquoise” module**

| term_ID    | description                                                    | FDR      |
|------------|----------------------------------------------------------------|----------|
| GO:0019219 | regulation of nucleobase-containing compound metabolic process | 3.90E-05 |
| GO:0044265 | cellular macromolecule catabolic process                       | 3.94E-05 |
| GO:0016567 | protein ubiquitination                                         | 5.74E-05 |
| GO:0070647 | protein modification by small protein conjugation or removal   | 6.24E-05 |
| GO:0044267 | cellular protein metabolic process                             | 0.001    |
| GO:0043412 | macromolecule modification                                     | 0.003    |
| GO:0017148 | negative regulation of translation                             | 0.006    |
| GO:0032482 | Rab protein signal transduction                                | 0.03     |

453

454
